# Supplementary material for: Elevated Urinary Connective Tissue Growth Factor in Diabetic Nephropathy Is Caused by Local Production and Tubular Dysfunction
Source: Hindawi journal article supplement (doi:10.1155/2015/539787), 2015-01-01
Supplement: f1 [file 539787.f1.pdf]

## Electronic supplementary material

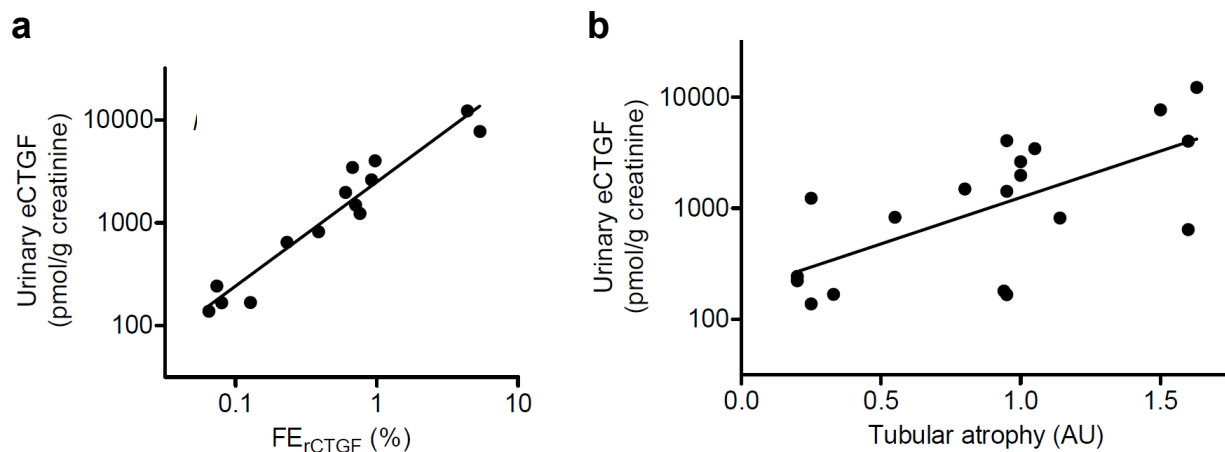

**ESM Fig. 1** Excretion expressed per gram creatinine gives comparable results as excretion expressed per 24h (see Fig. 1 for results per 24h). **(a)** Urinary endogenous CTGF excretion (eCTGF) correlates tightly with FE<sub>rCTGF</sub>,  $r=0.96$ ,  $p<0.0001$ . **(b)** Urinary eCTGF correlates with tubular atrophy,  $r=0.67$ ,  $p=0.002$ .

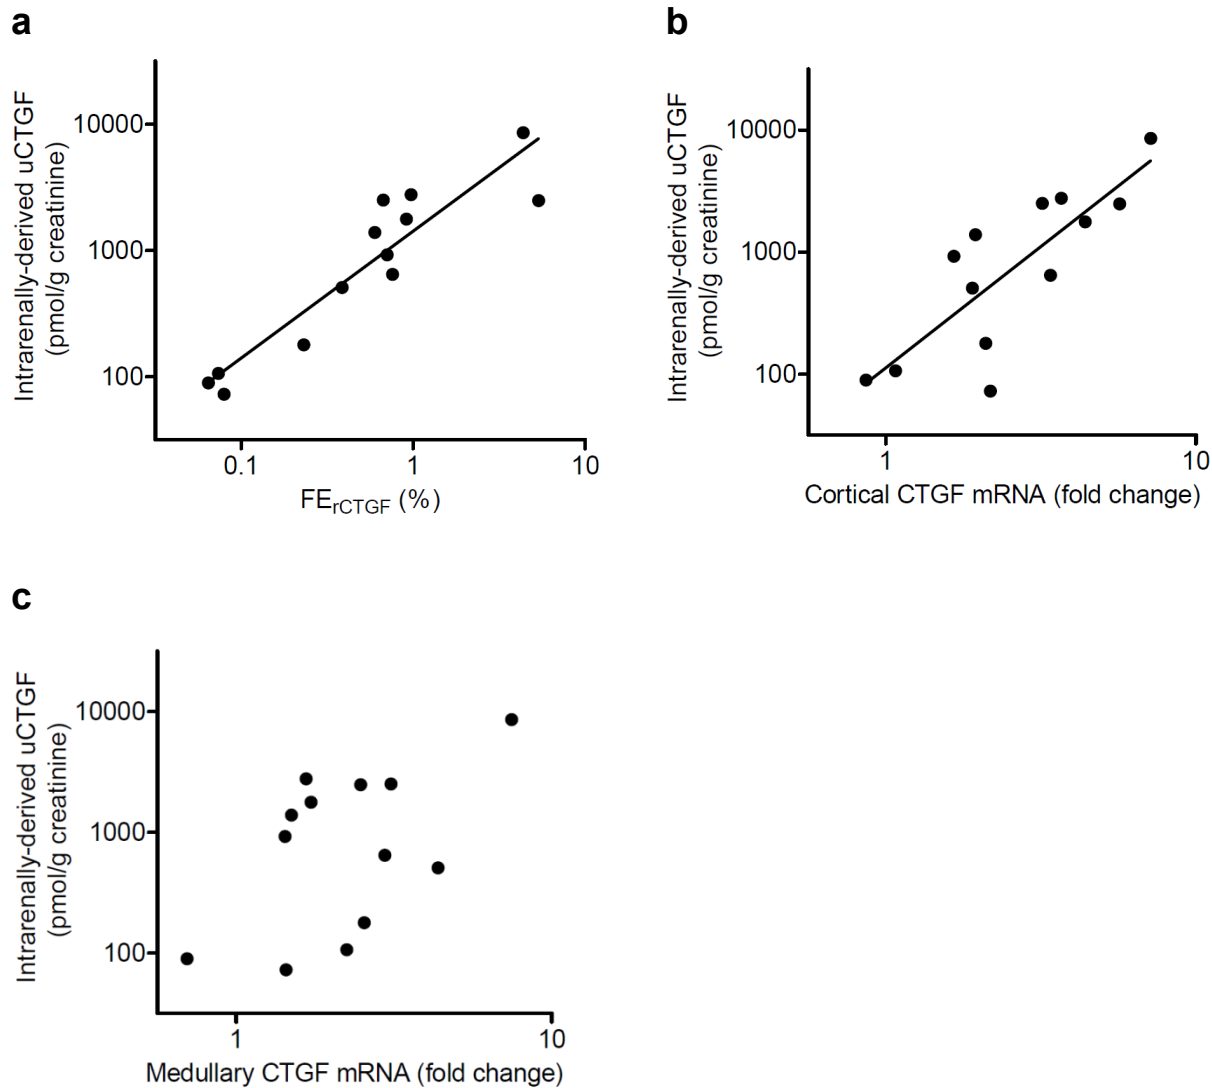

**ESM Fig. 2** Excretion expressed per gram creatinine gives comparable results as excretion expressed per 24h (see Fig. 4 for results per 24h). **(a)** Tight linear correlation between intrarenally-derived uCTGF and FE<sub>rCTGF</sub> ( $r=0.93$ ,  $p<0.0001$ ,  $slope=1.0\pm 0.1$ ) suggests that tubular reabsorption failure is a major determinant of intrarenally-derived uCTGF. **(b)** Cortical CTGF mRNA levels correlate significantly with the intrarenally-derived urinary CTGF (uCTGF),  $r=0.81$ ,  $p=0.008$ . **(c)** Medullary CTGF expression does not correlate with intrarenally-derived uCTGF.
